# Supplementary material
Source: PubMed Central journal article supplement (PMC4258125)
Supplement: NIHMS629875-supplement-2.pdf [file NIHMS629875-supplement-2.pdf]

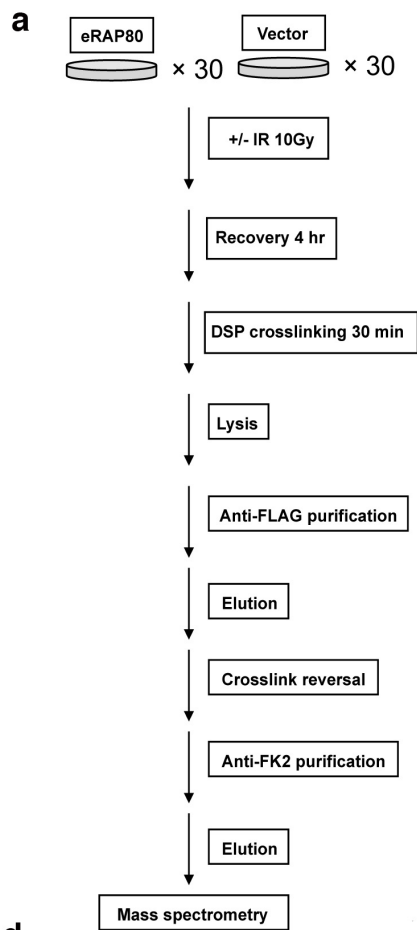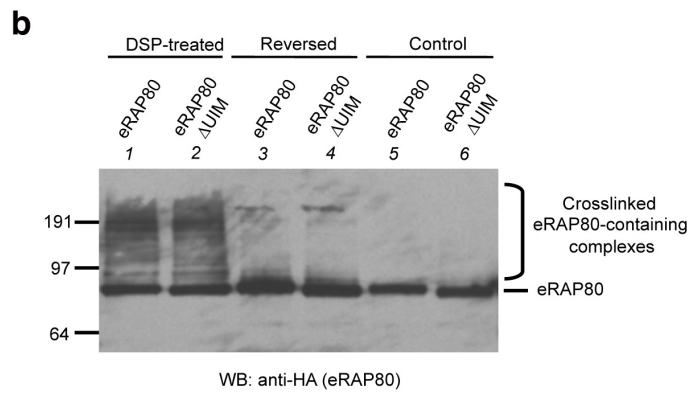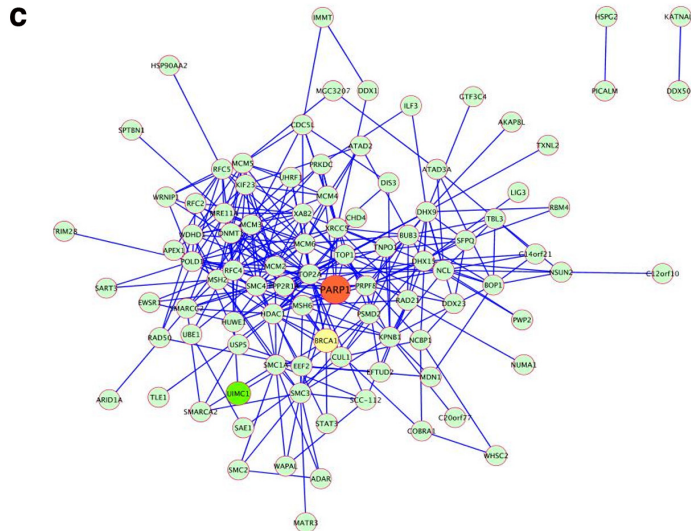

**d** PARP1 peptides identified by mass spectrometry

| position         | peptide sequence      |
|------------------|-----------------------|
| 108 <sup>1</sup> | K.TLGDFAAEYAK.S       |
| 165 <sup>1</sup> | K.NREELGFRPEYSASQLK.G |
| 207 <sup>1</sup> | K.RKGDEVDGVDEVAK.K    |
| 269 <sup>1</sup> | K.QQVPSGESAILDR.V     |
| 452 <sup>5</sup> | R.VVSEDFLQDVSASTK.S   |
| 486 <sup>2</sup> | K.AEPVEVVAPR.G        |
| 551 <sup>2</sup> | K.VFSATLGLVDIVK.G     |
| 684 <sup>1</sup> | K.AMVEYEIDLQK.M       |
| 747 <sup>1</sup> | K.KPPLLNNADSVQAK.V    |
| 779 <sup>1</sup> | R.GGSDDSSKDPIDVNYEK.L |
| 865 <sup>5</sup> | R.TTNFAGILSQGLR.I     |
| 878 <sup>2</sup> | R.IAPPEAPVTGYMFGK.G   |
| 893 <sup>1</sup> | K.GIYFADMVSK.S        |

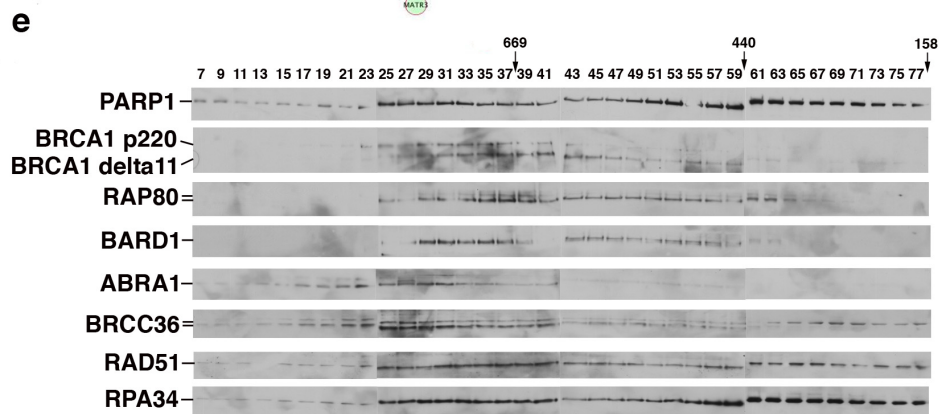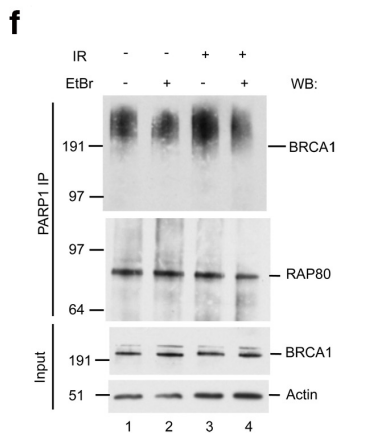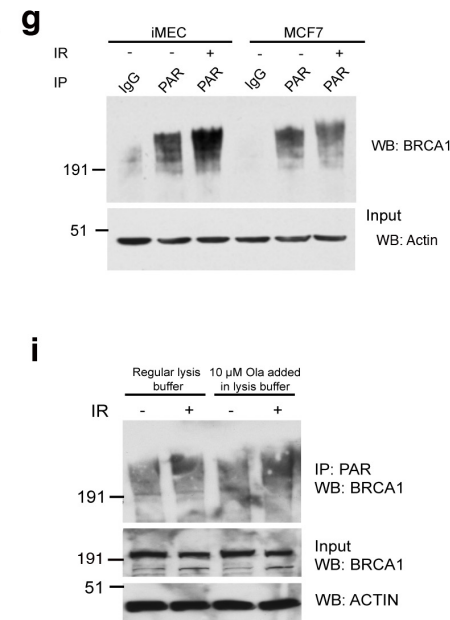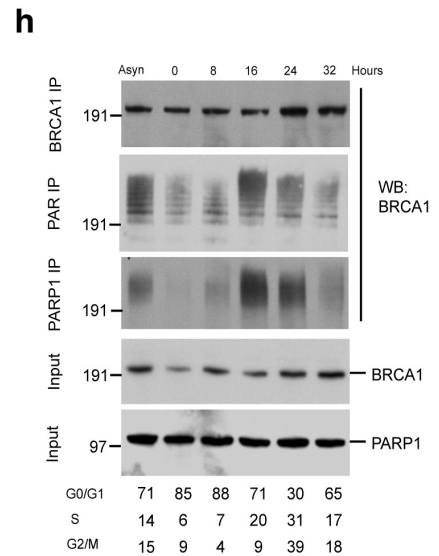

**Figure S1**

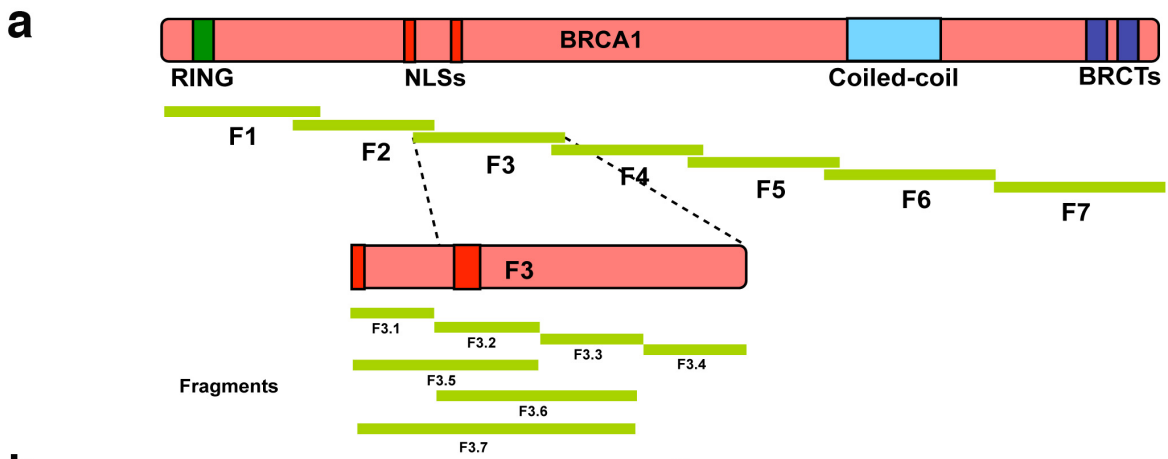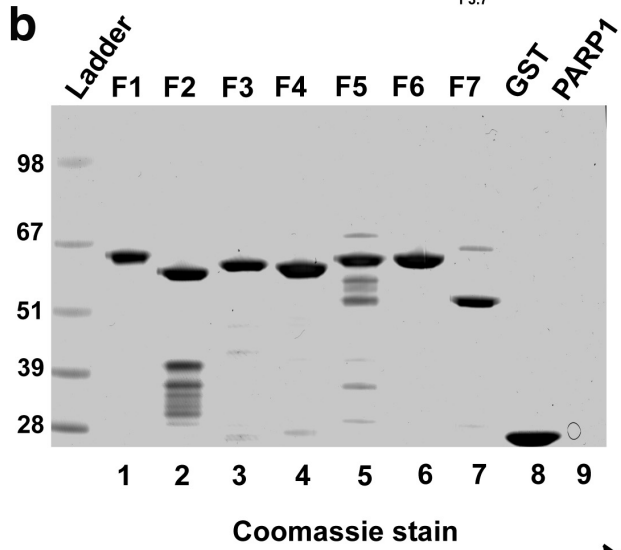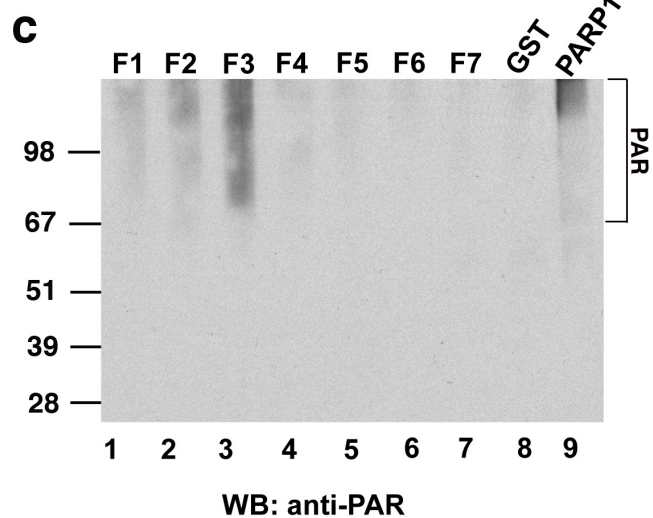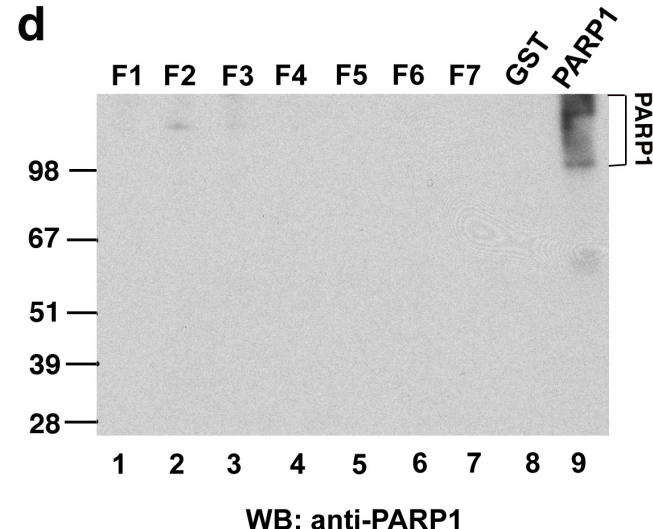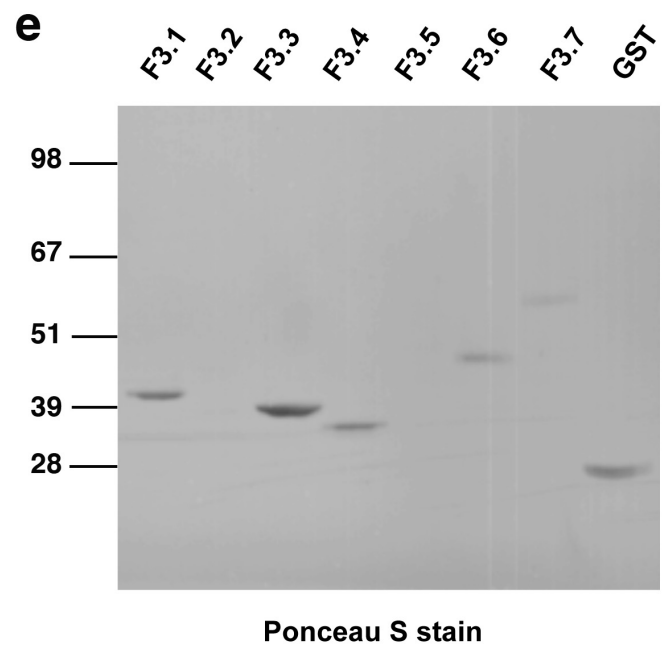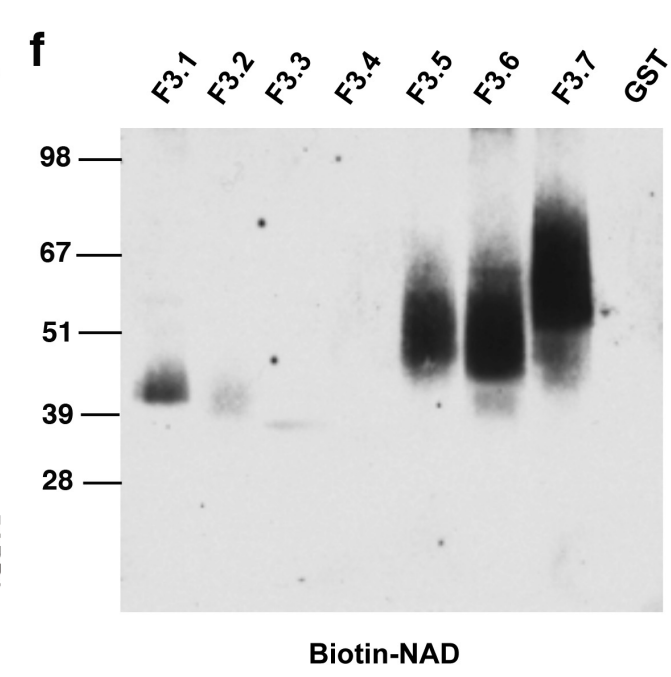

**Figure S2**

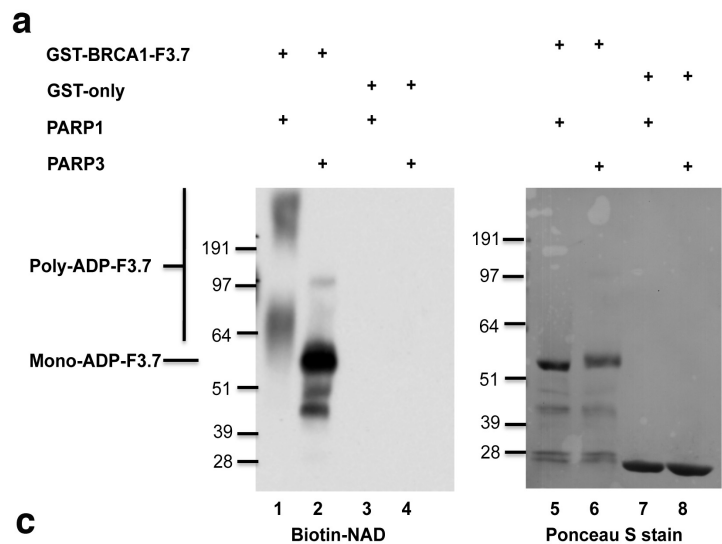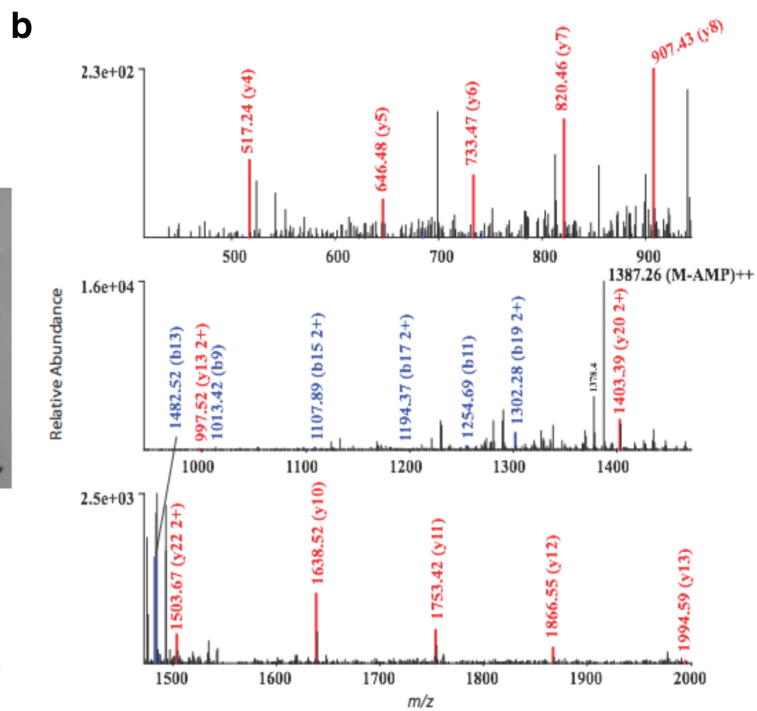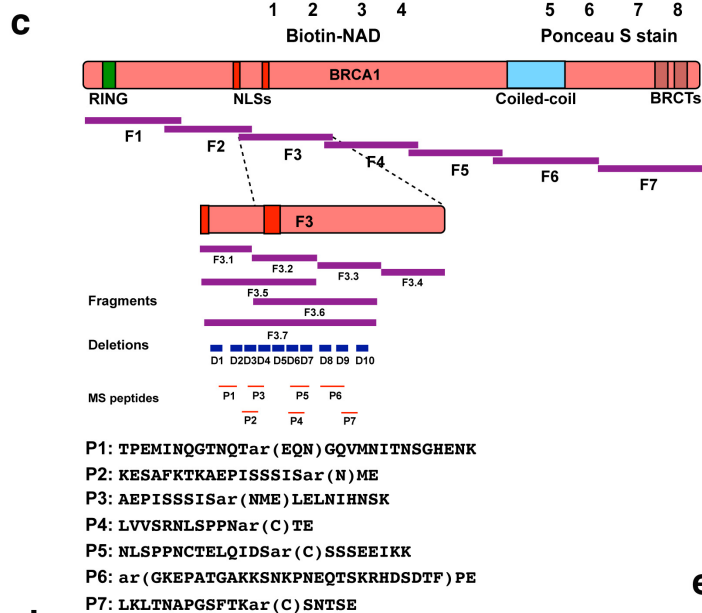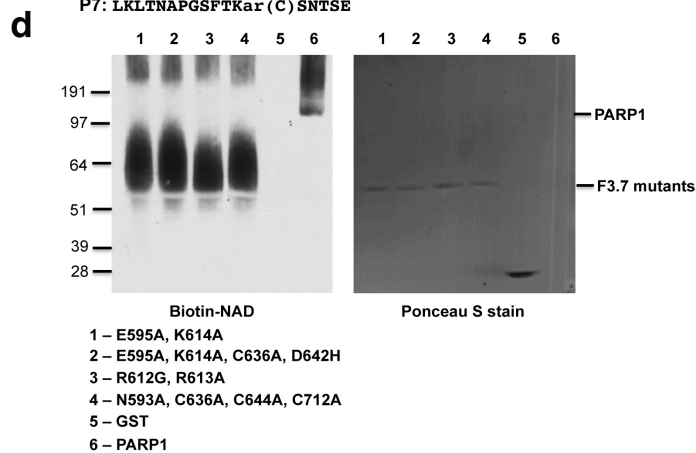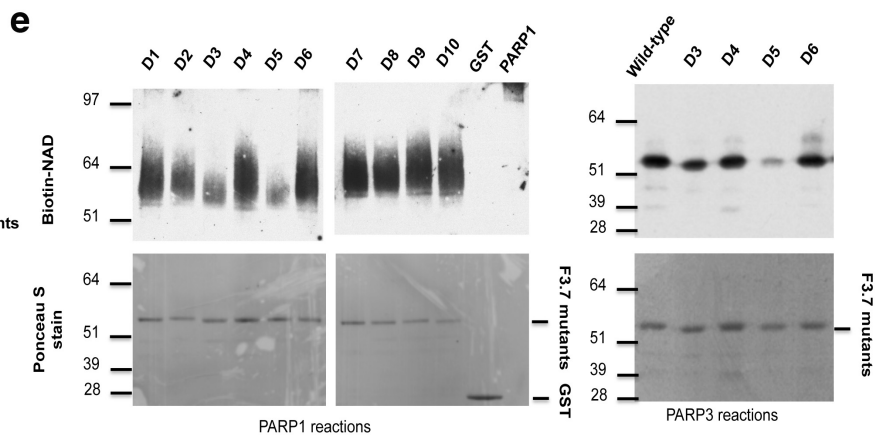

**Figure S3**

**BRCA1-HA-WT**

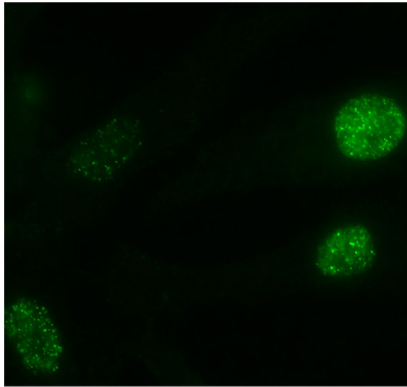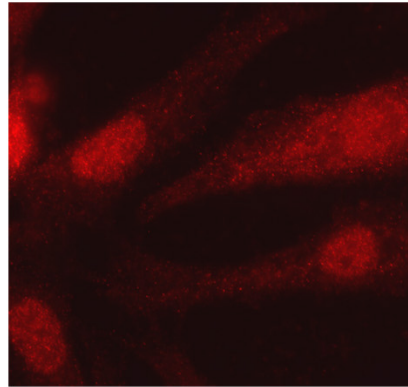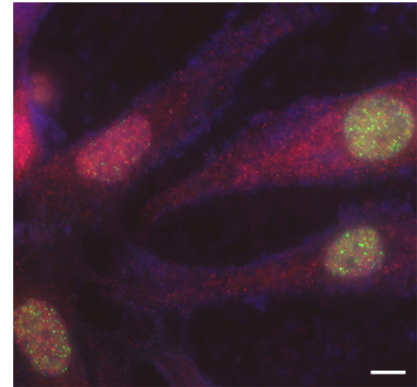

79.5%

**BRCA1-HA-D5**

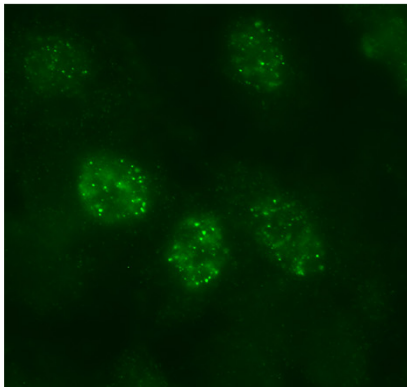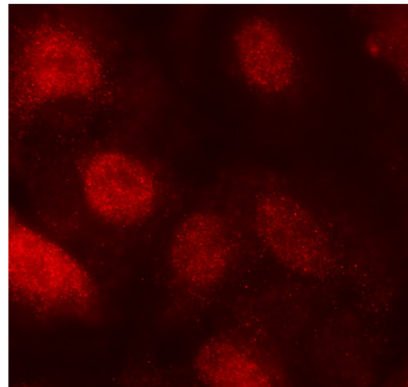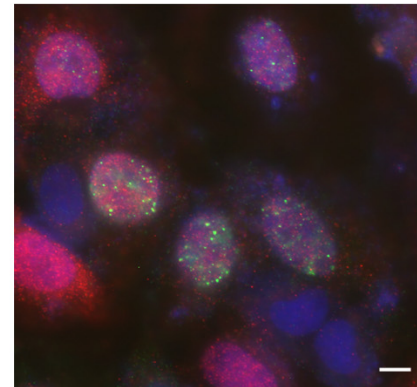

81.5%

**HA**

**Cyclin A**

**Merge+DAPI**

**Figure S4**



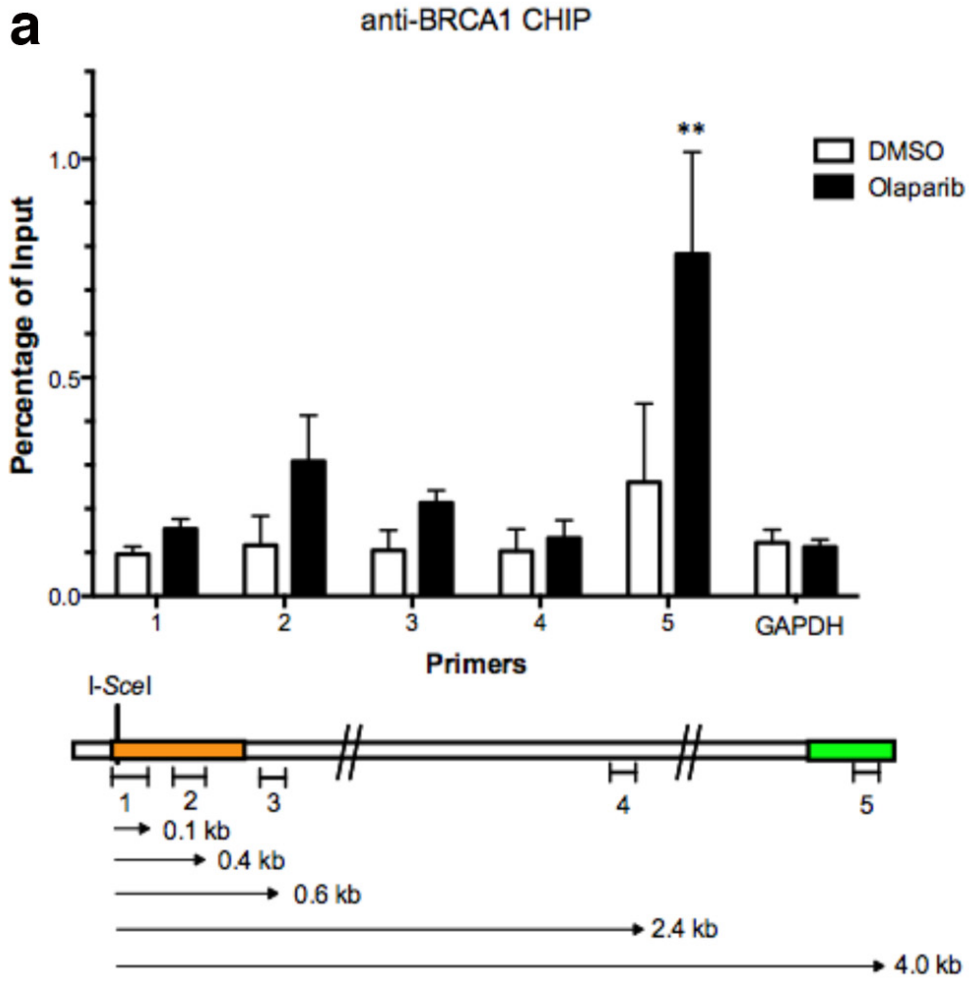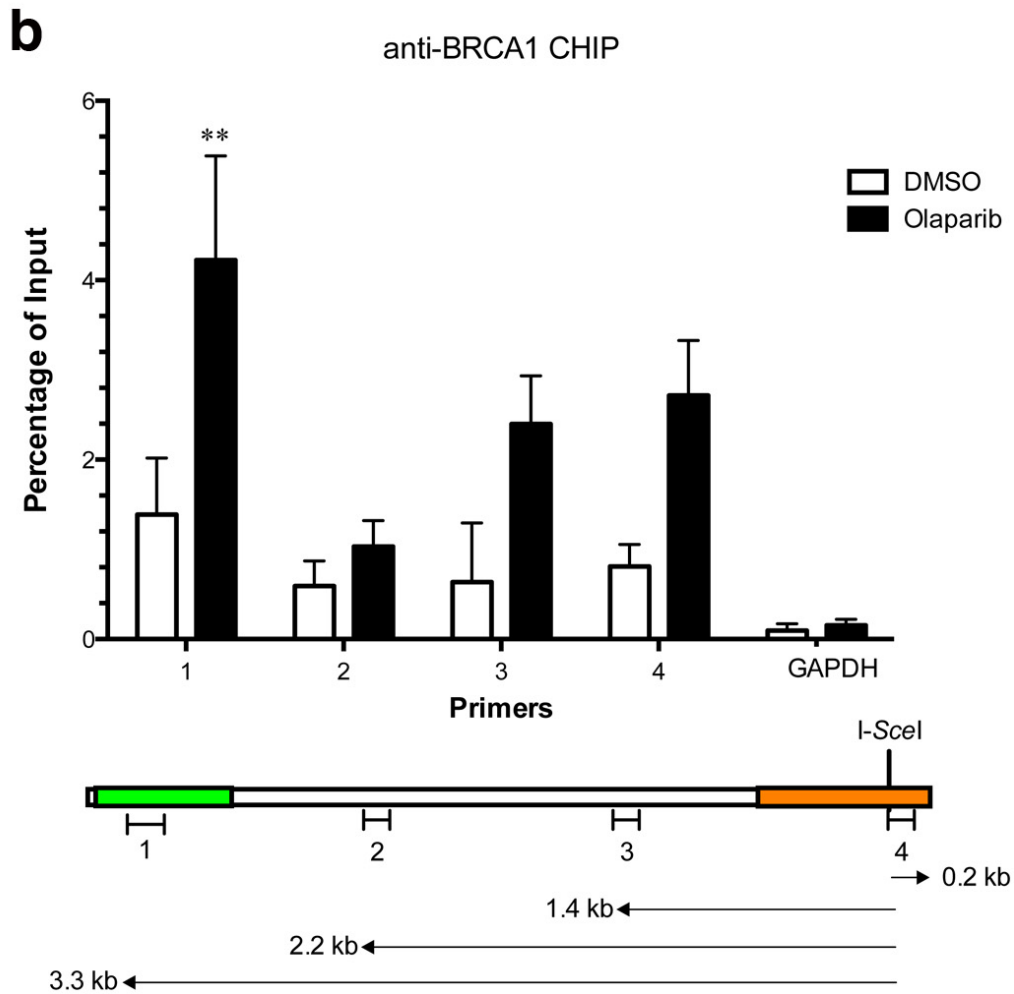

**Figure S5**

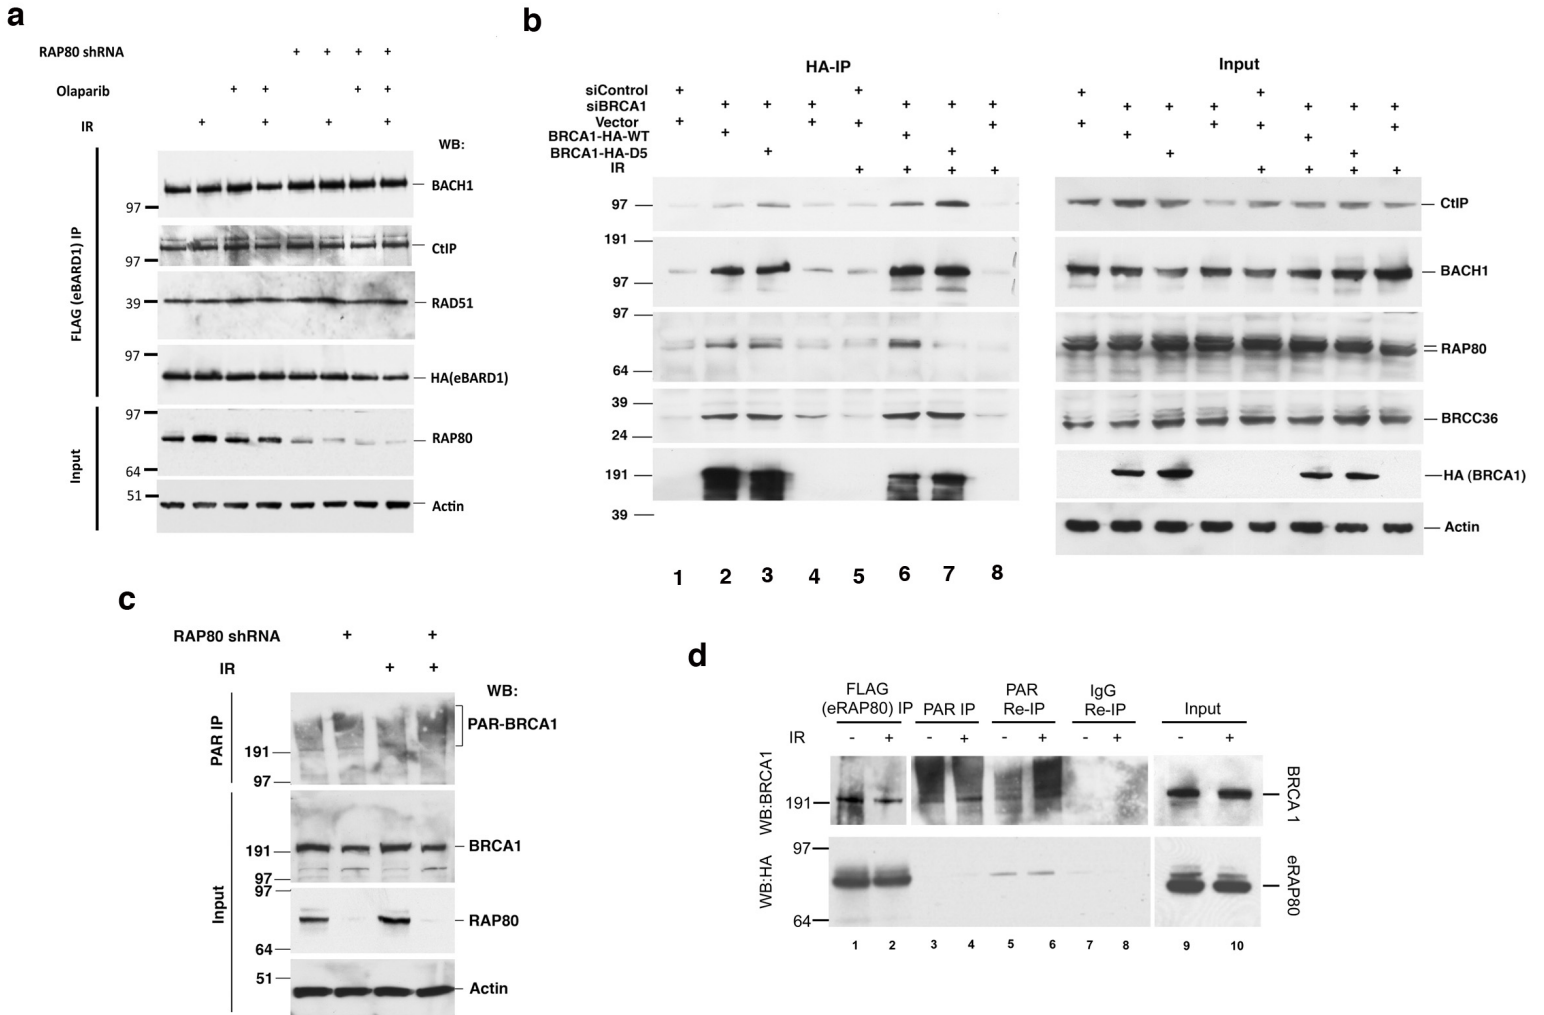

Figure S6

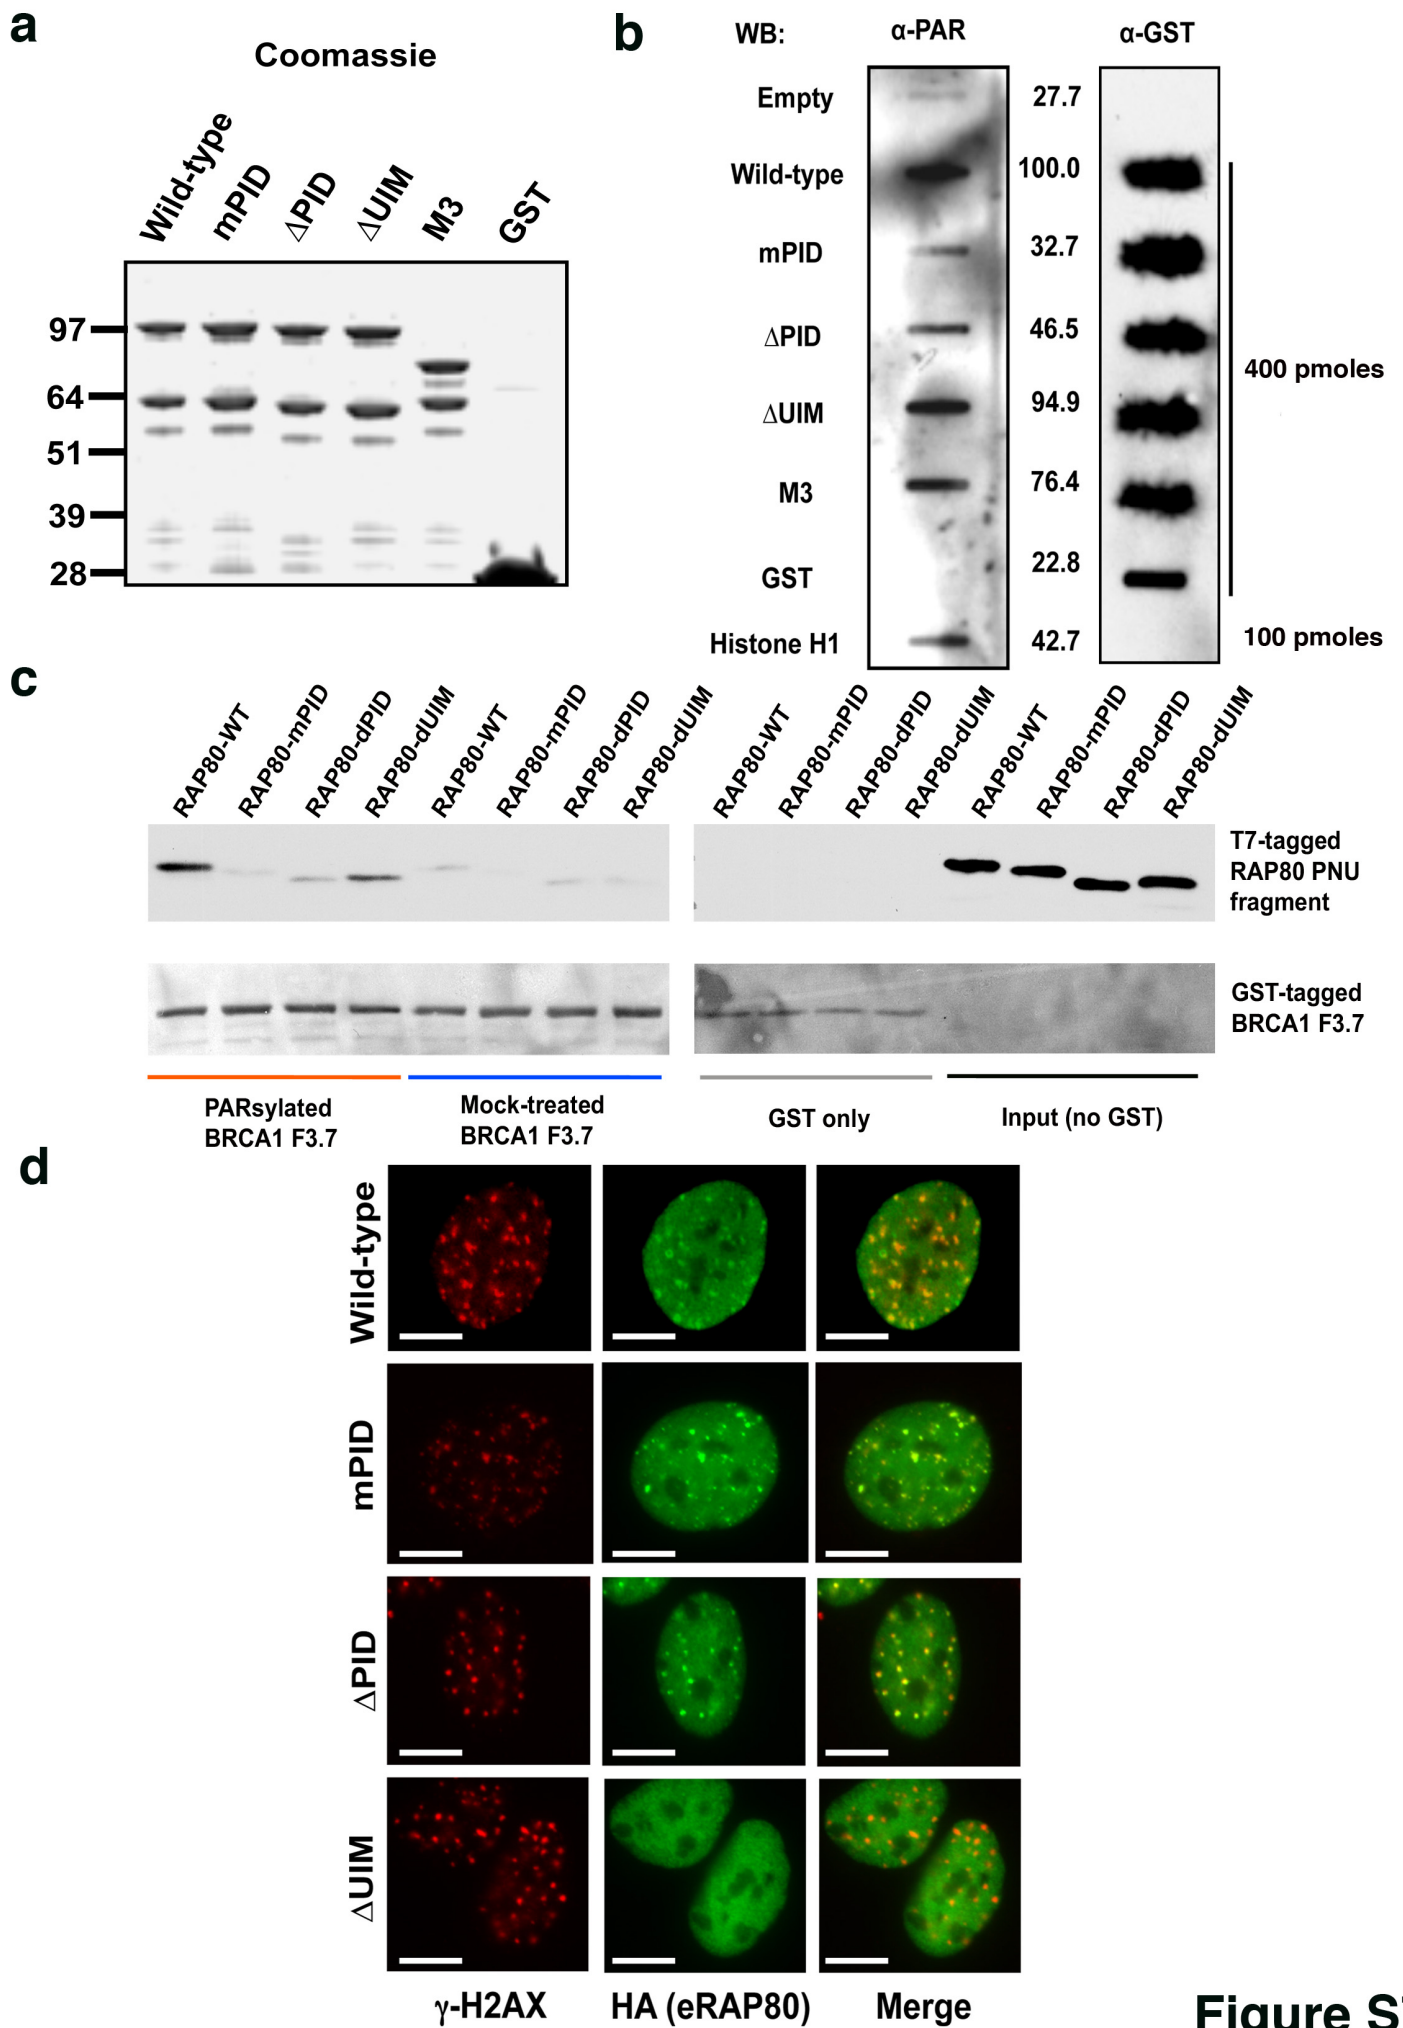

Figure S7

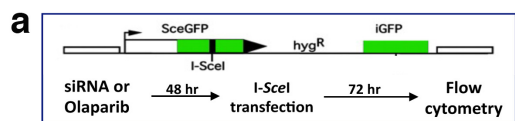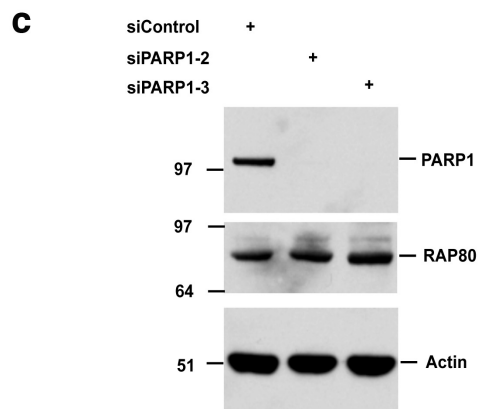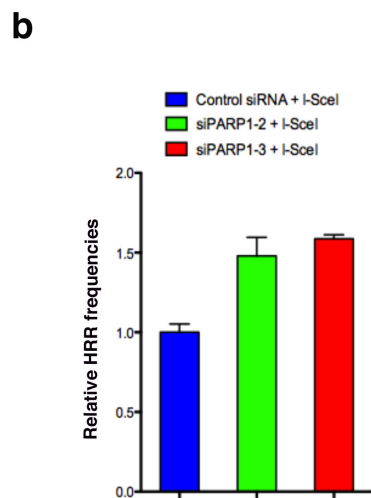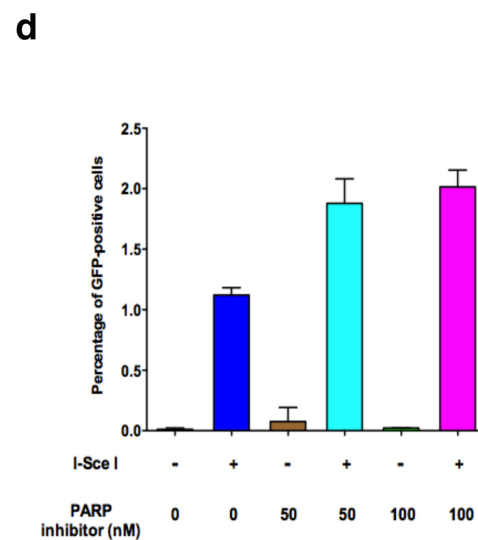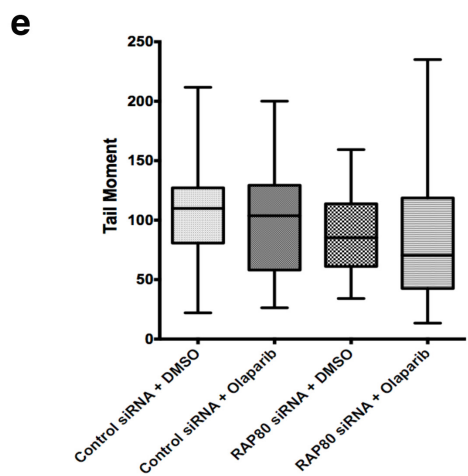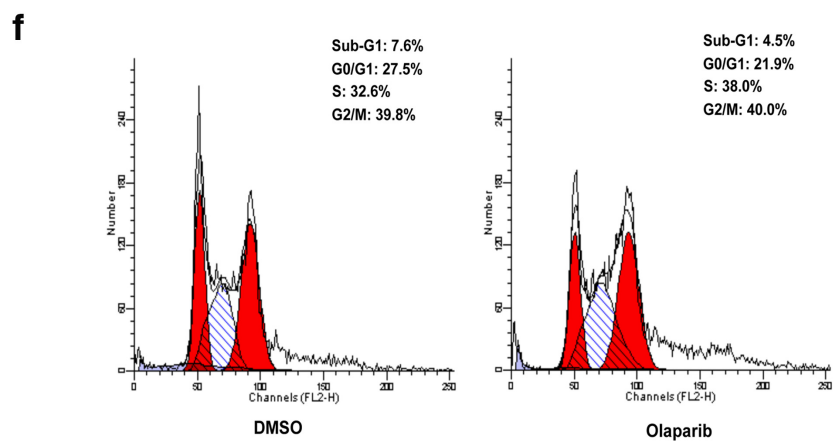

**g** **h** Effects of PARPI on I-SceI induced STGC

|           | IC50 (nM) |
|-----------|-----------|
| ISQ       | ~150      |
| Olaparib  | ~5        |
| Veliparib | ~5        |
| BMN-673   | ~0.5      |

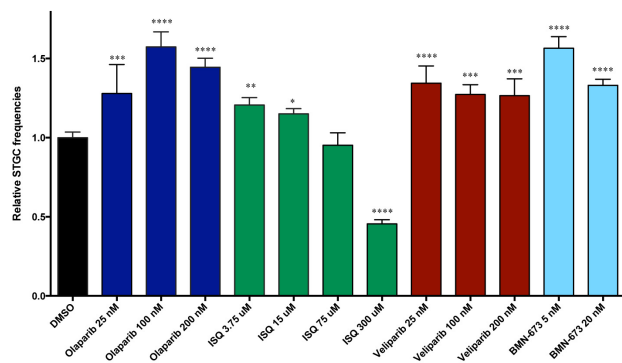

**i** Effects of PARPI on I-SceI induced LTGC

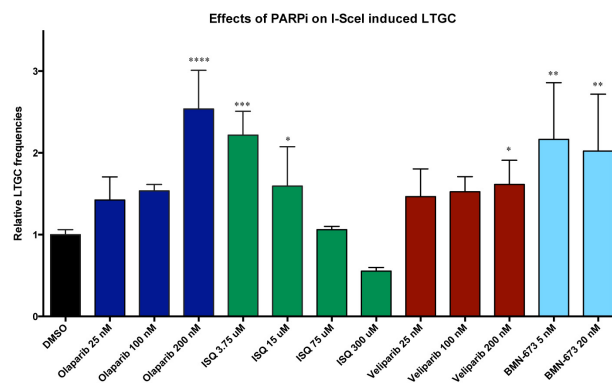

**Figure S8**



**a**

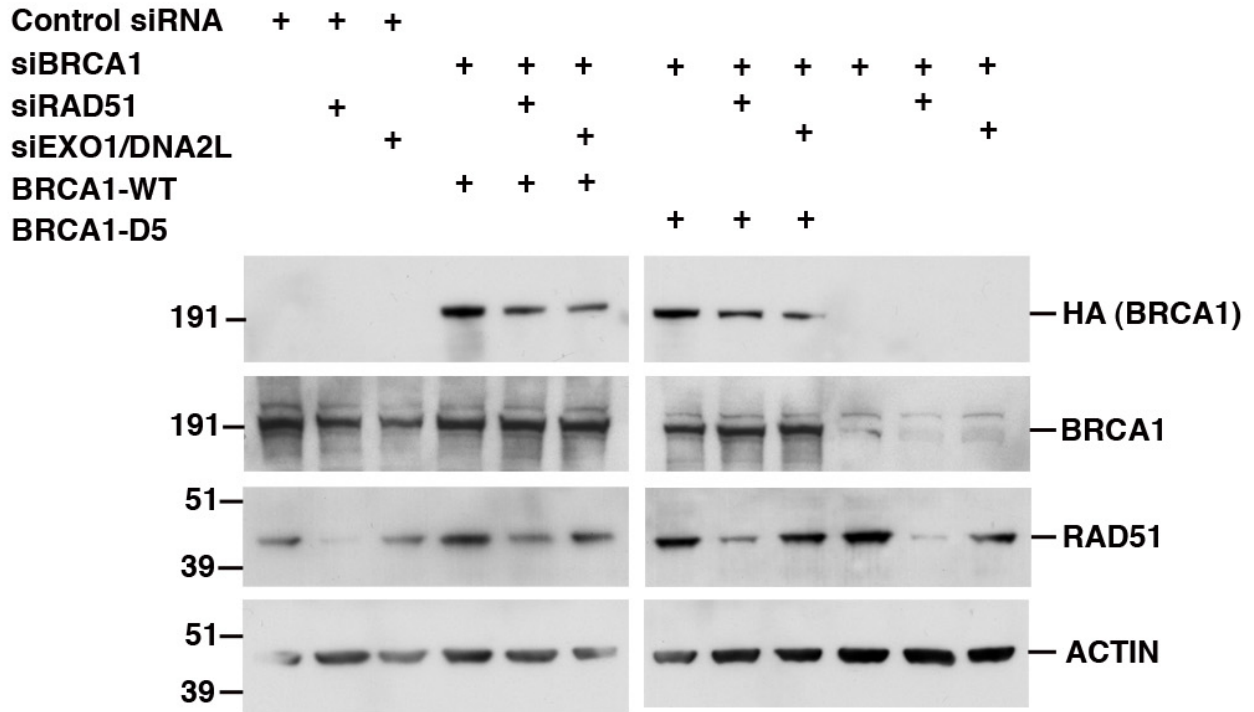

**b**

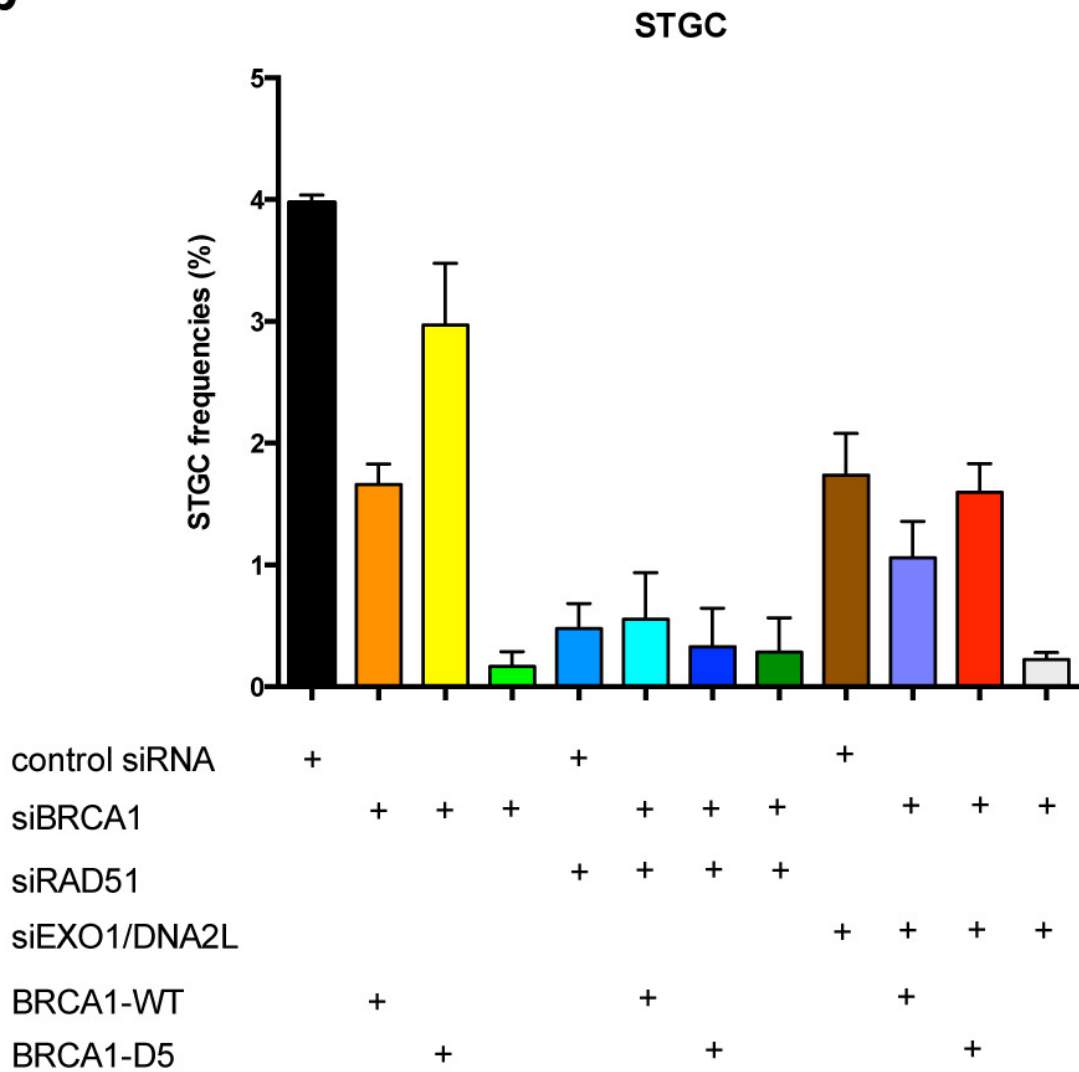

**Figure S9**
